# Supplementary material
Source: PubMed Central journal article supplement (PMC6599575)
Supplement: NIHMS1528437-supplement-8.pdf [file NIHMS1528437-supplement-8.pdf]

## Layer 1 Convolutional Filters

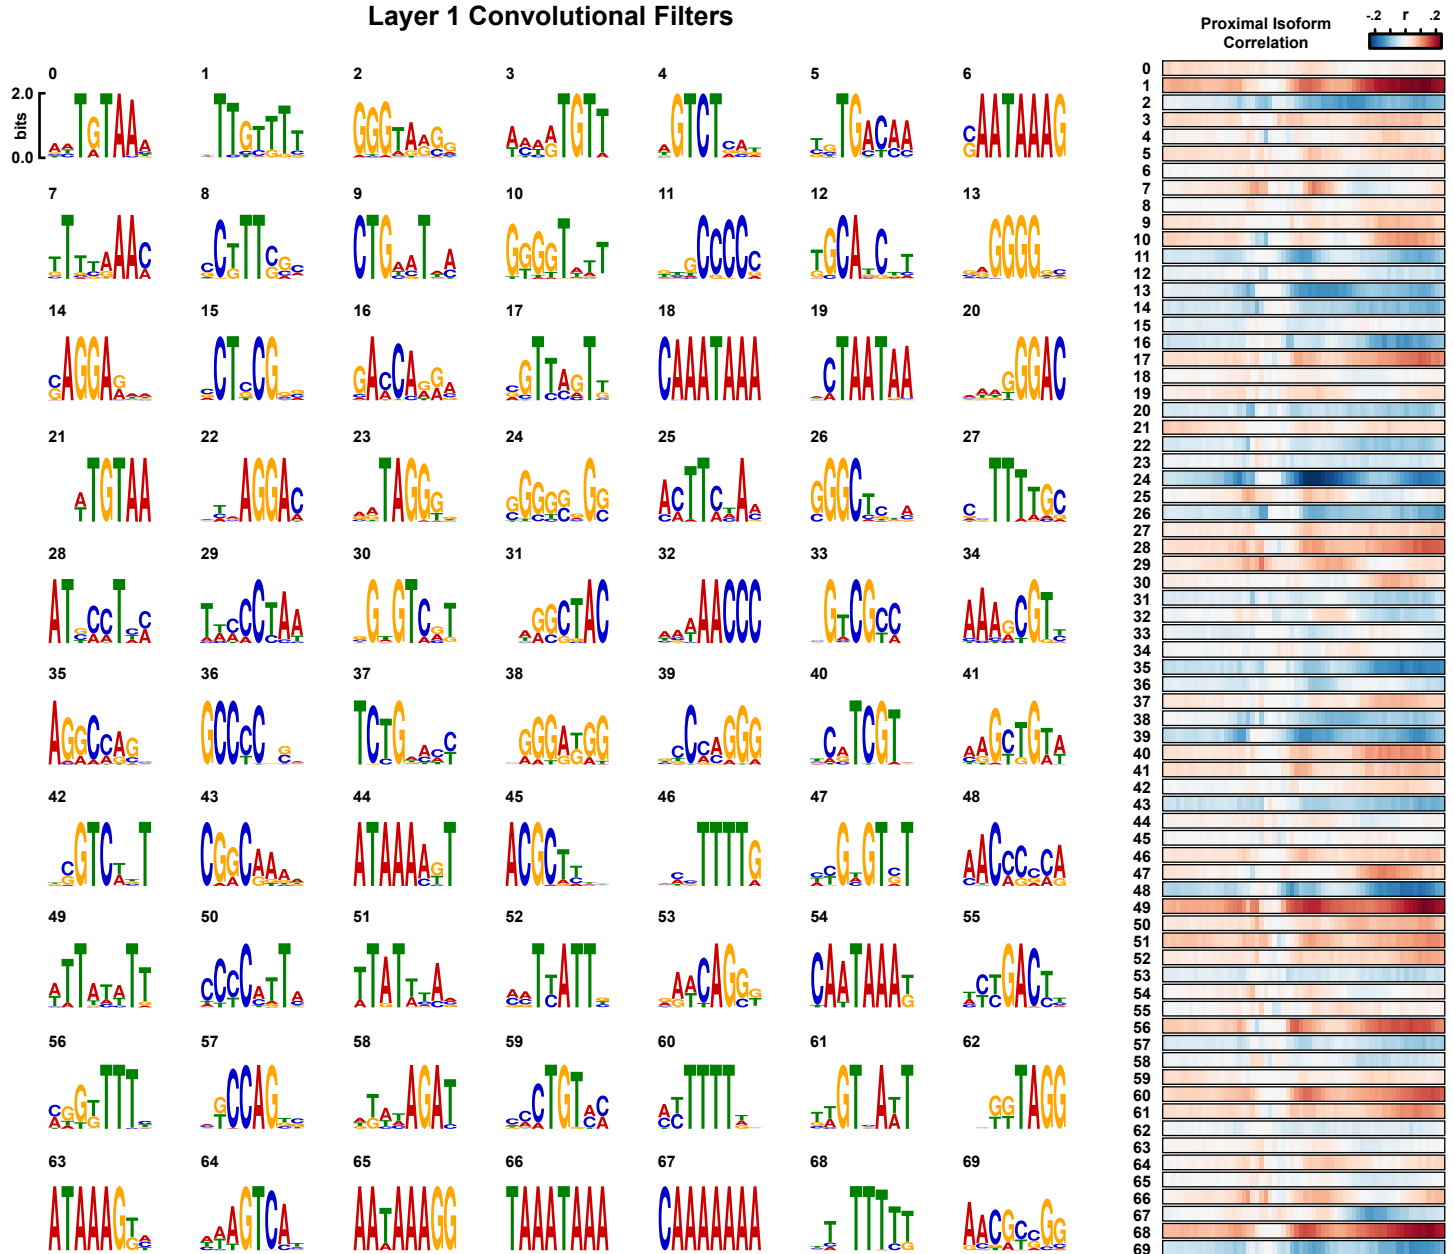

**Table S1. Convolutional Layer 1 Filter Logos. Related to Figure 2**

Layer 1 filter consensus logos (generated by stacking maximally activating subsequences into a PWM) and position effects (generated by computing Pearson's correlation coefficient between filter activations and proximal isoform log odds predictions).

## Layer 2 Convolutional Filters

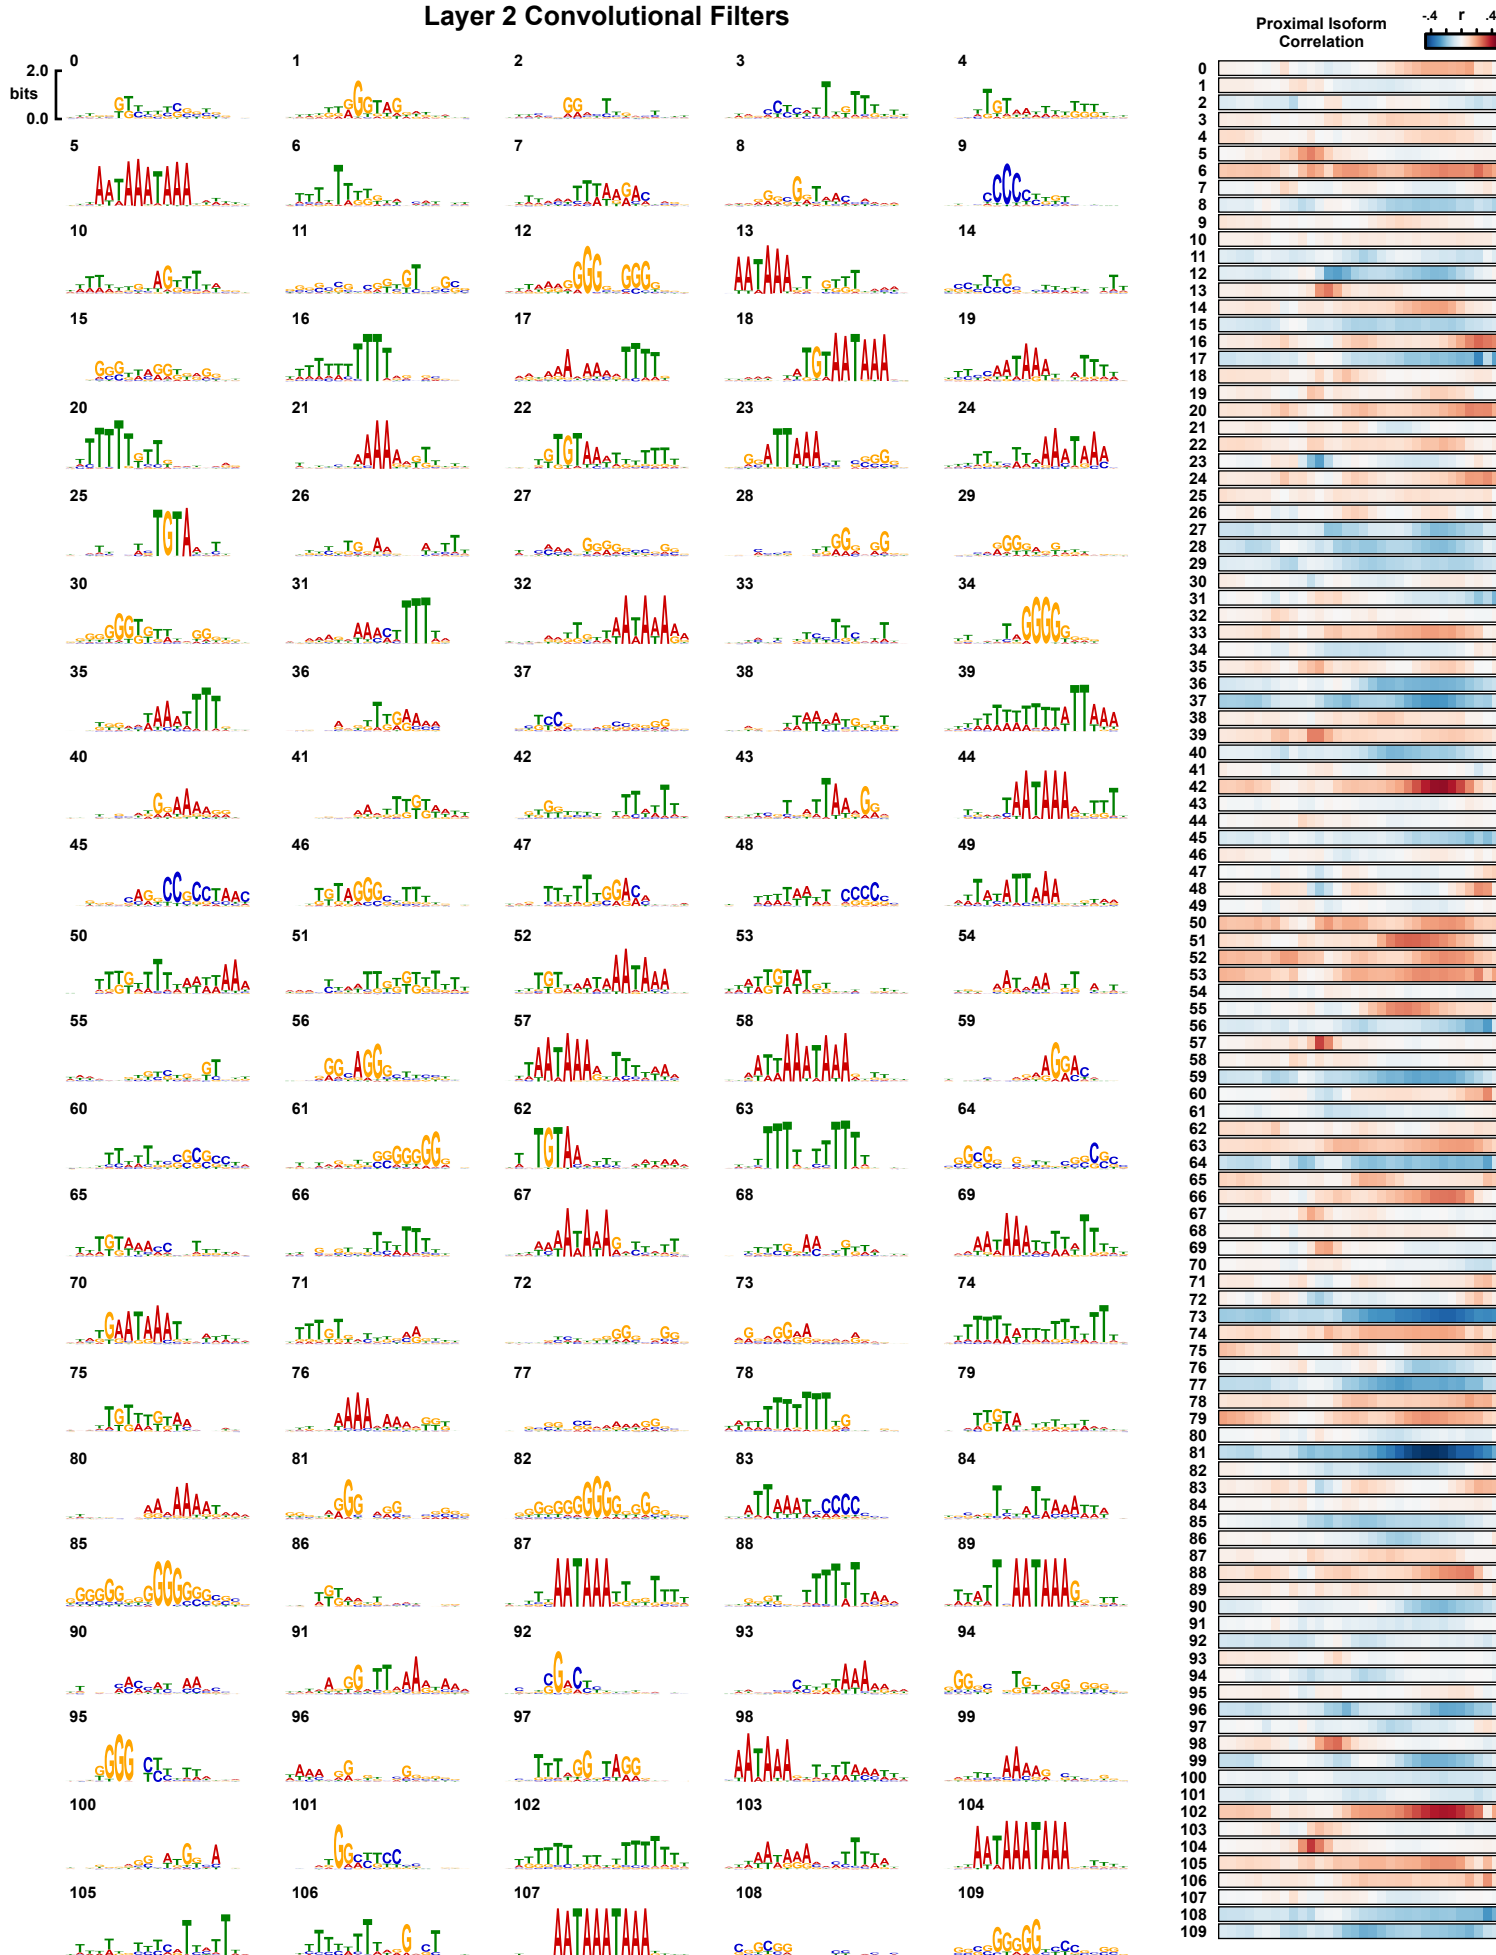

**Table S2. Convolutional Layer 2 Filter Logos. Related to Figure 2**

Layer 2 filter consensus logos (generated by stacking maximally activating subsequences into a PWM) and position effects (generated by computing Pearson's correlation coefficient between filter activations and proximal isoform logodds predictions).
