# Supplementary material
Source: PubMed Central journal article supplement (PMC6599575)

**A**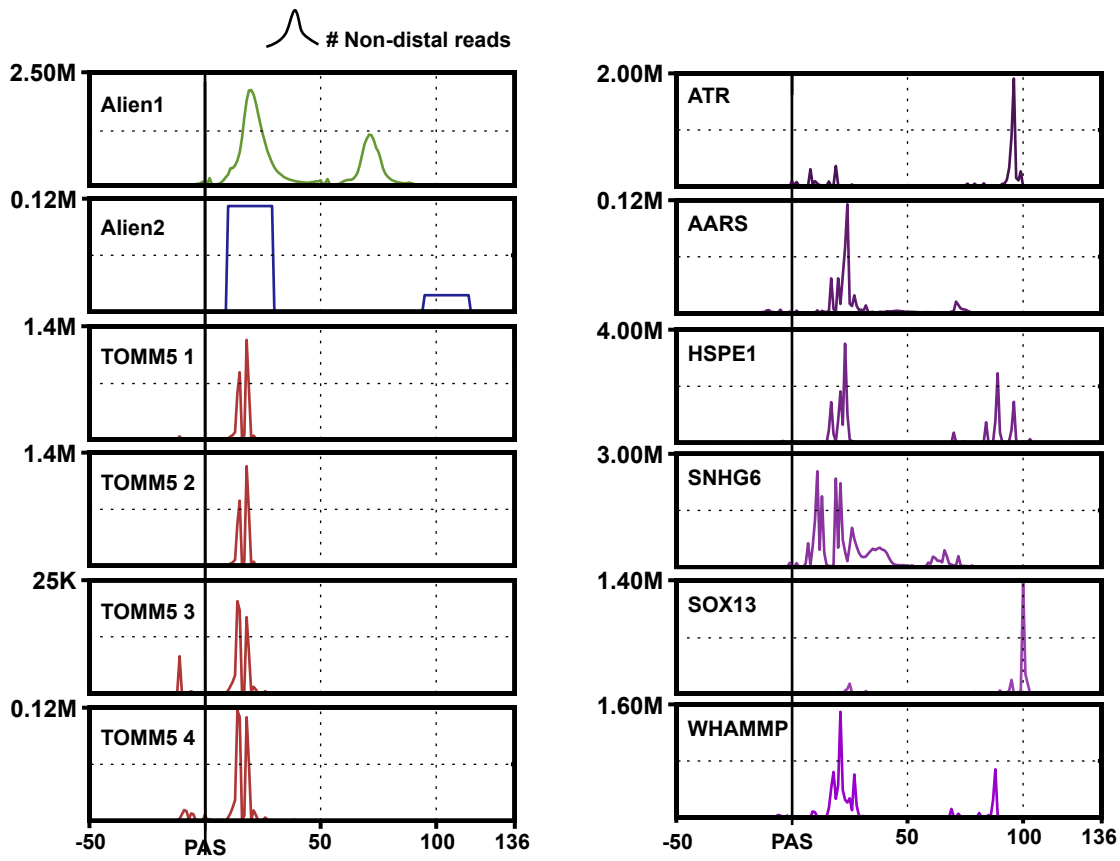**B**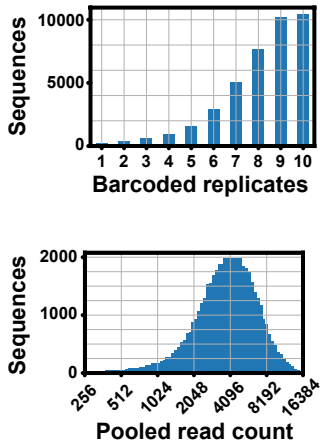**C**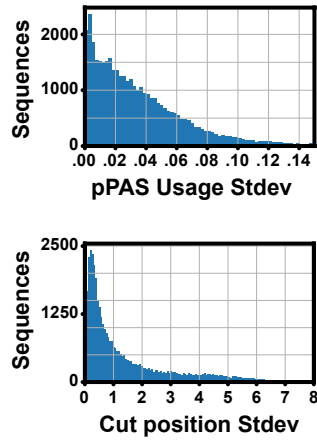**D**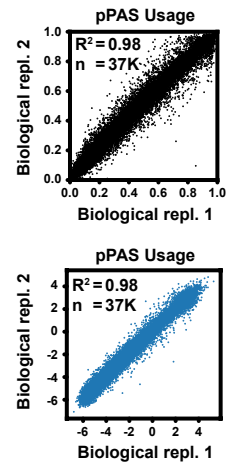

Supplement: NIHMS1528437-supplement-1.pdf [file NIHMS1528437-supplement-1.pdf]

**A**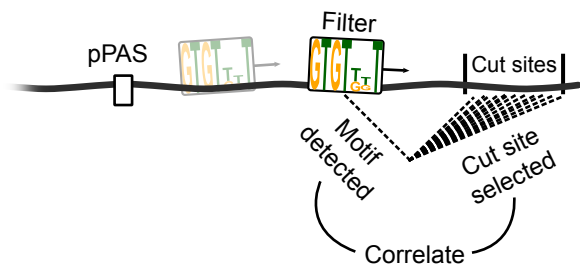**B**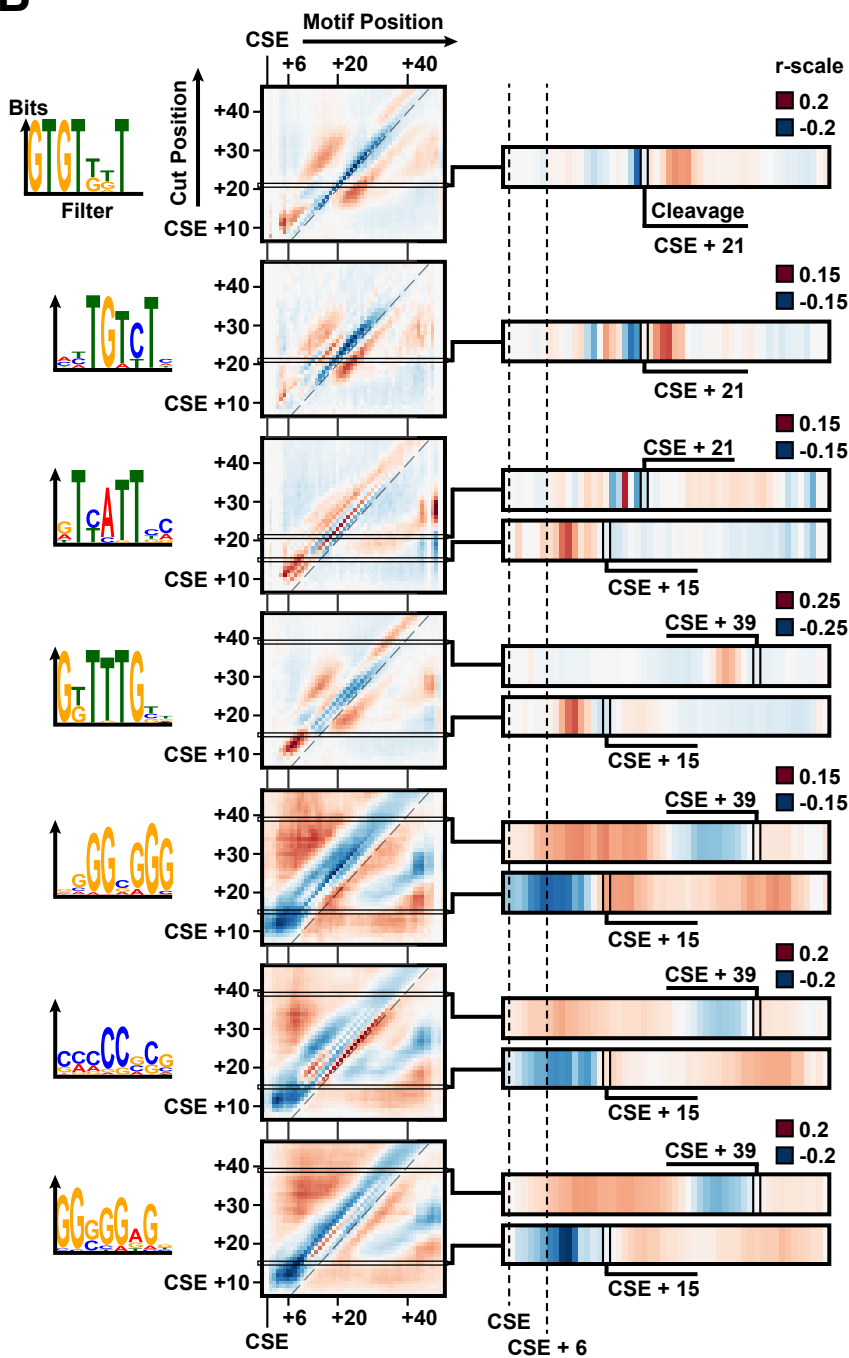**C**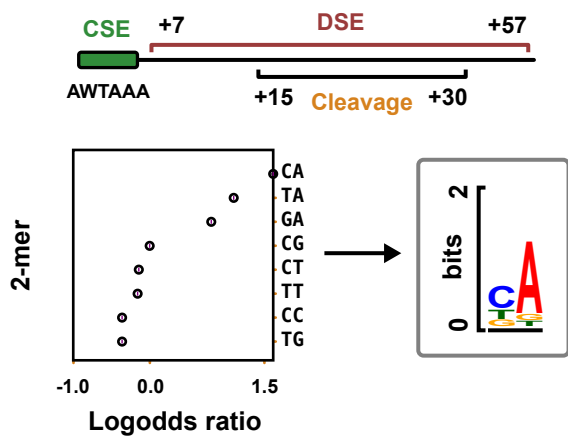

Supplement: NIHMS1528437-supplement-3.pdf [file NIHMS1528437-supplement-3.pdf]

**A****Site Usage Prediction**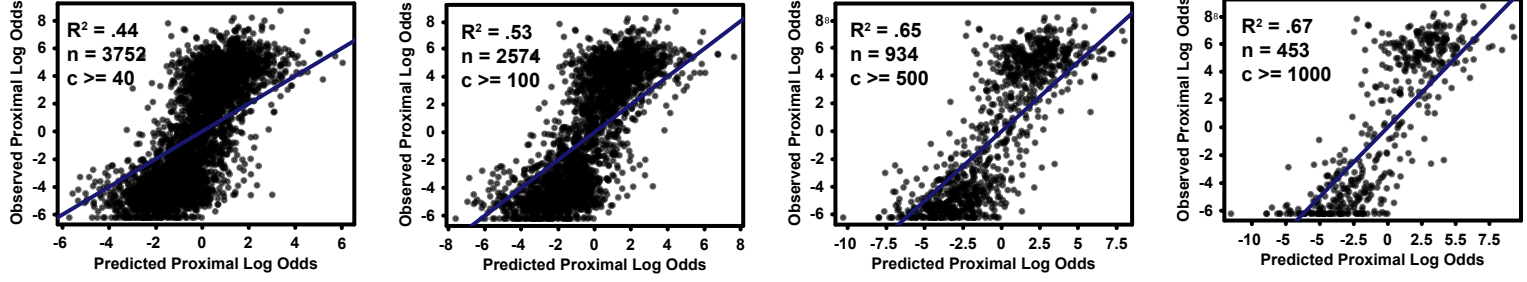

Increasing Read Coverage

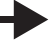**B**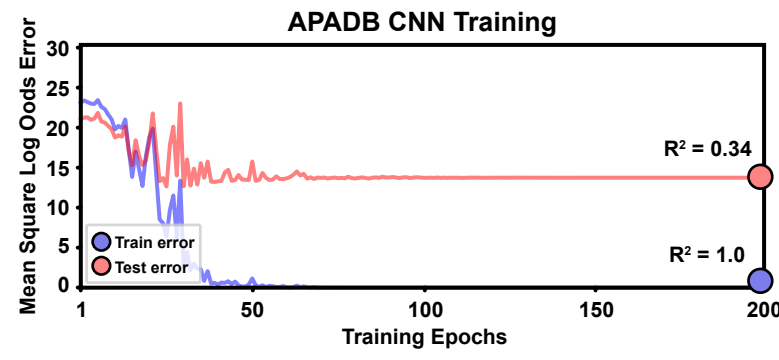**C**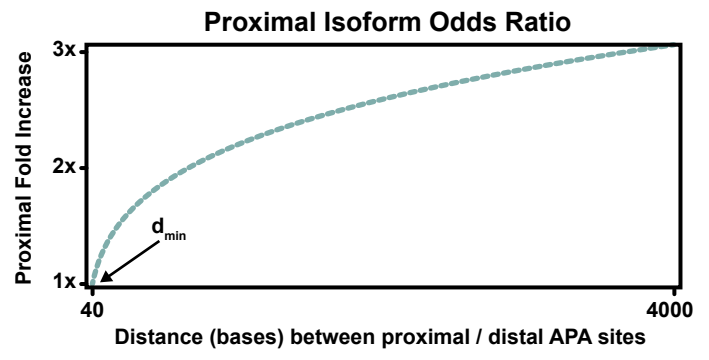**D**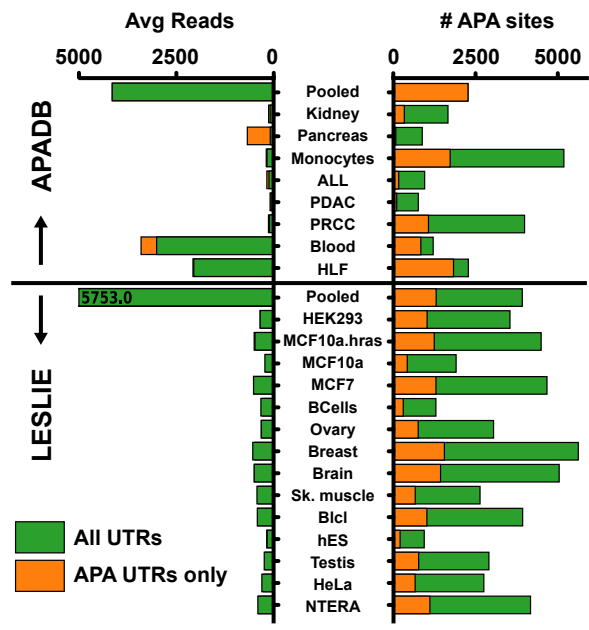**E**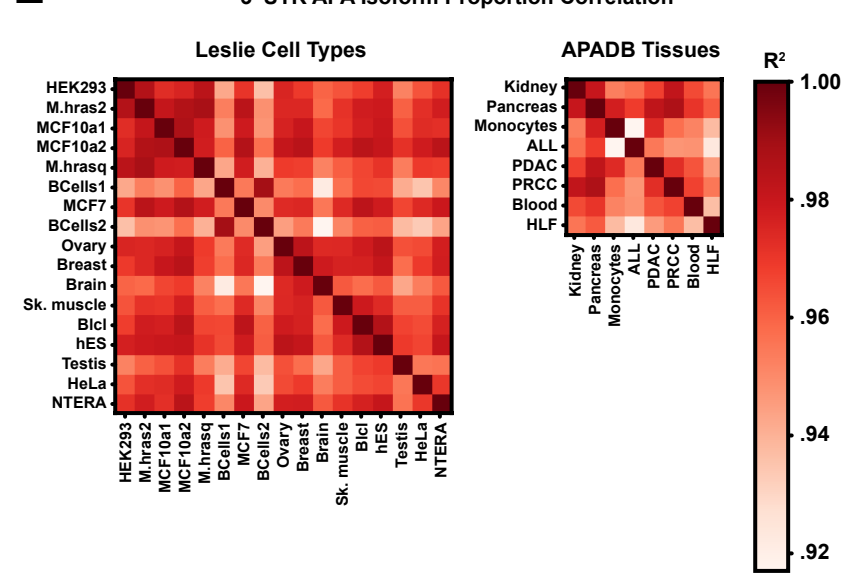

Supplement: NIHMS1528437-supplement-5.pdf [file NIHMS1528437-supplement-5.pdf]

**A**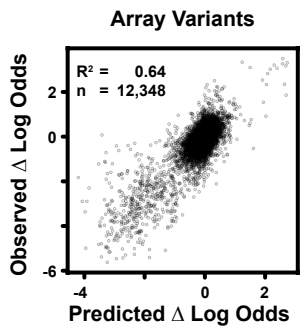**B**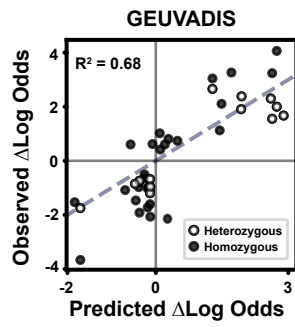**C**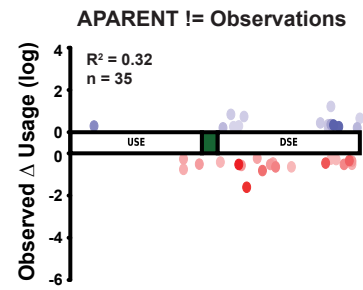**D**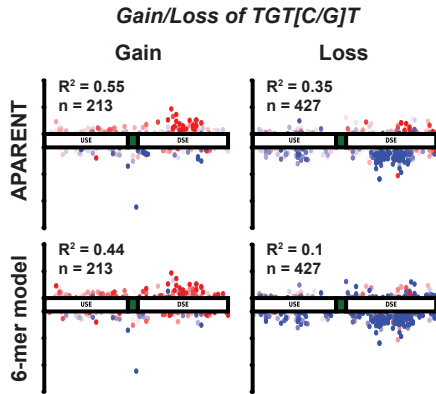**E**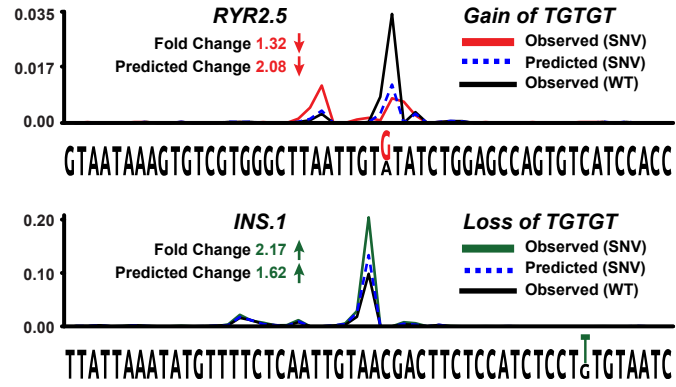**F**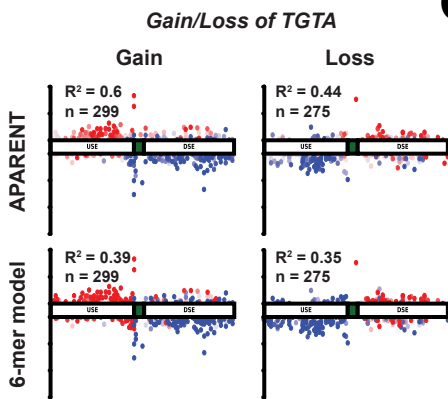**G**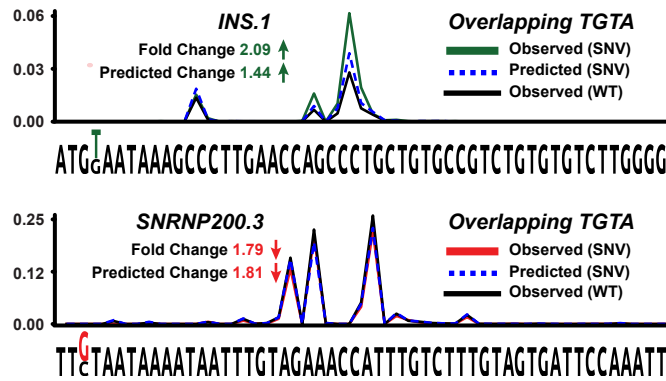**H**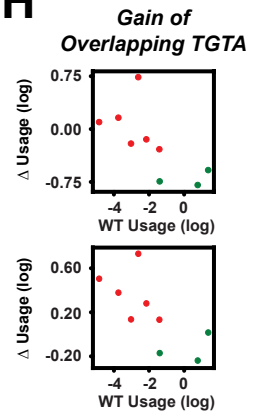**I****Cryptic CSE variants**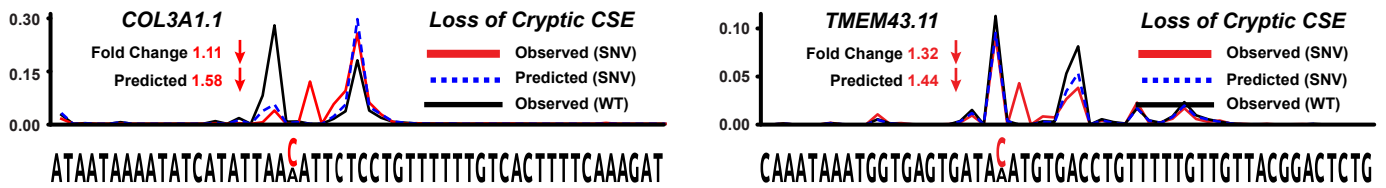**J****Folding variants**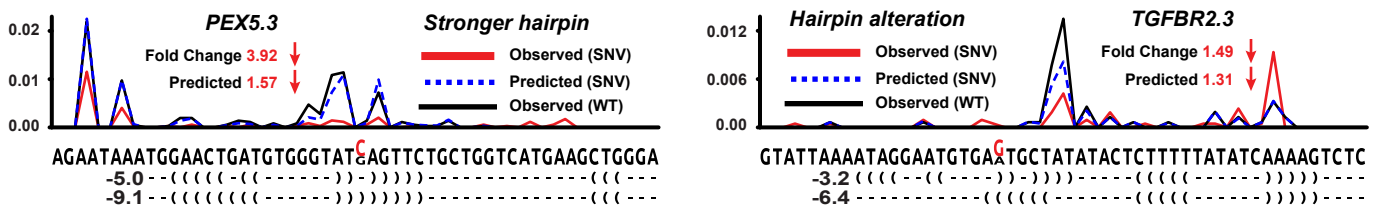**K****Cut variants**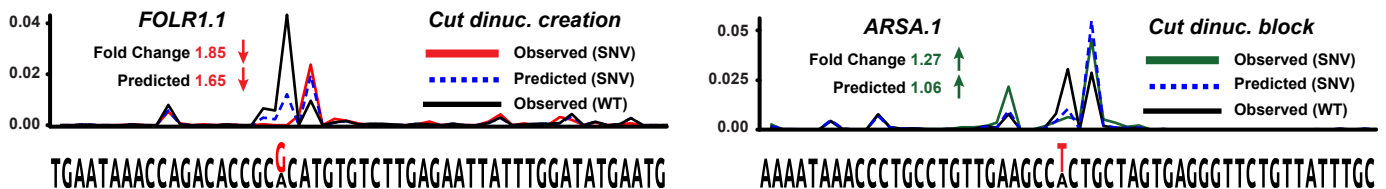

Supplement: NIHMS1528437-supplement-6.pdf [file NIHMS1528437-supplement-6.pdf]

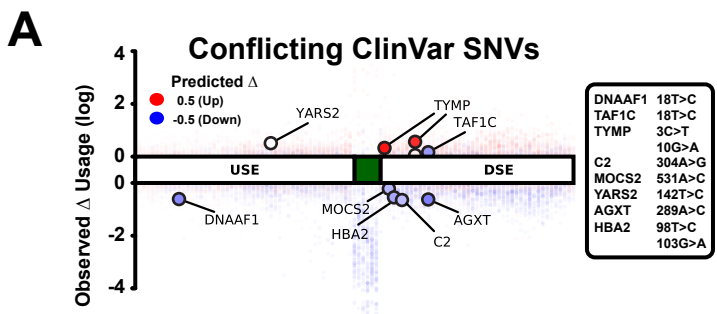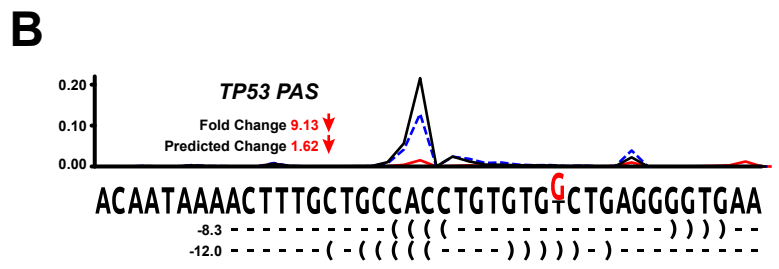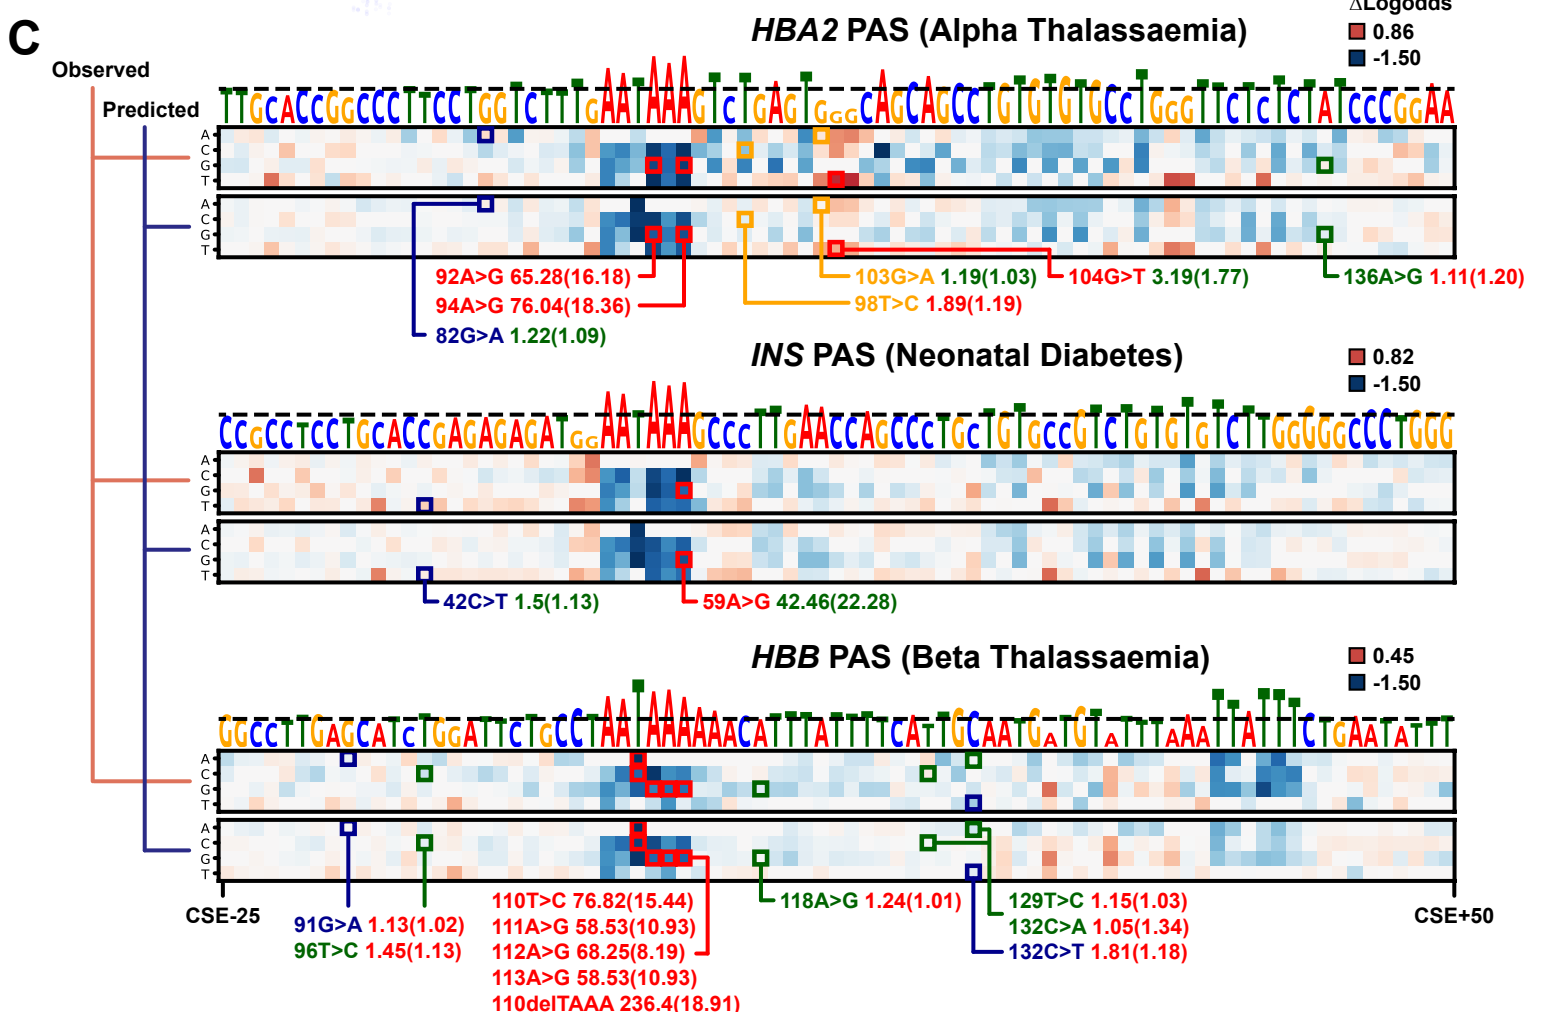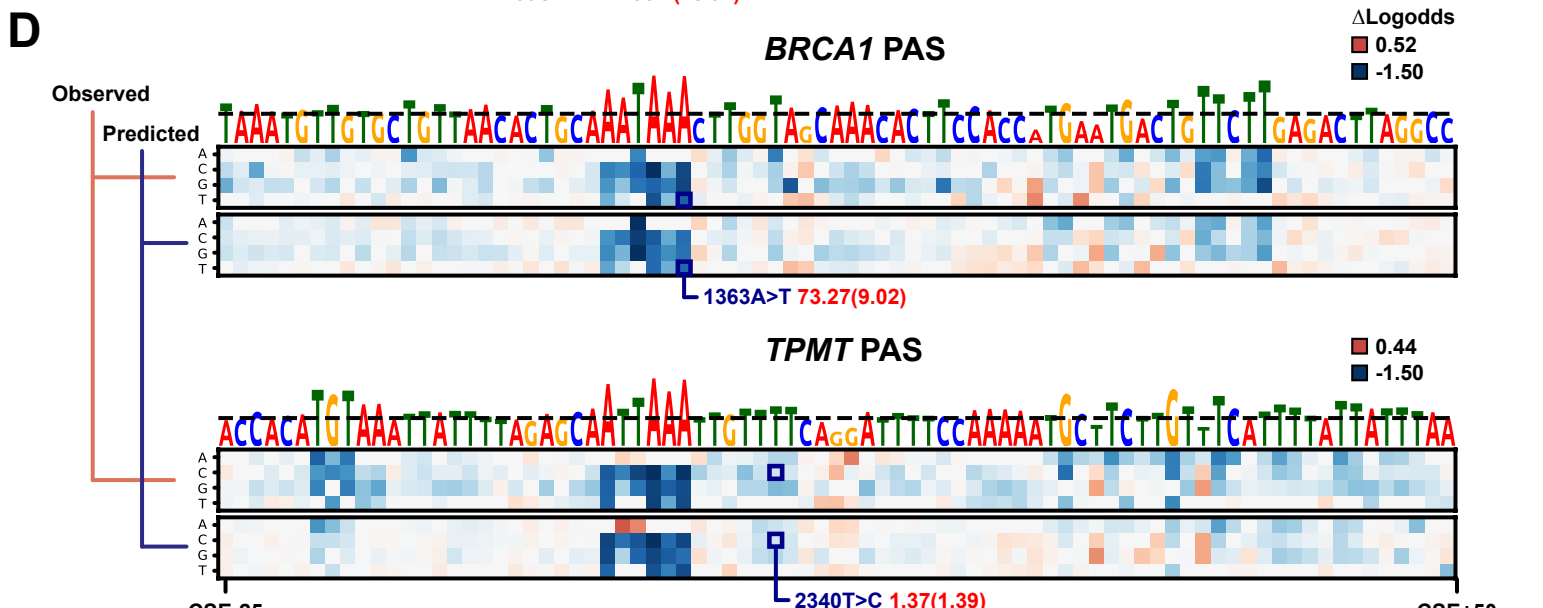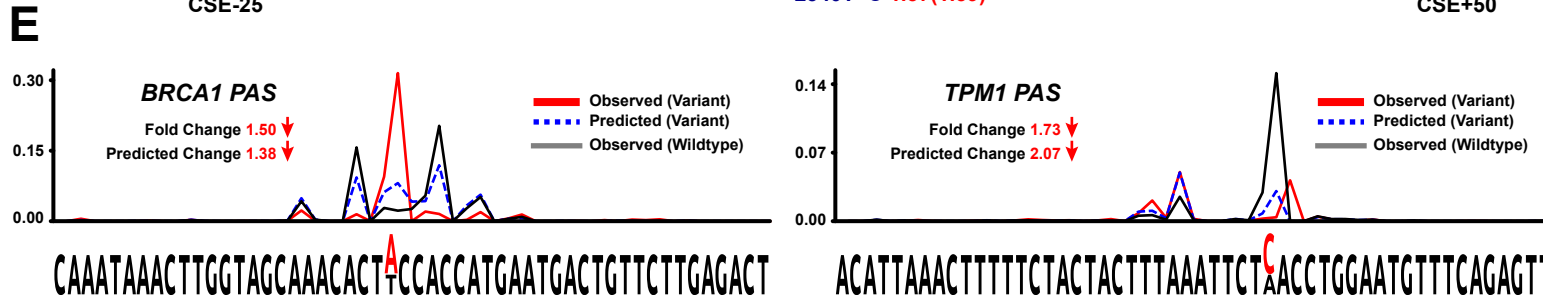

Supplement: NIHMS1528437-supplement-7.pdf [file NIHMS1528437-supplement-7.pdf]
